# Supplementary material
Source: PubMed Central journal article supplement (PMC5074615)
Supplement: supp_pp.16.00852_PP2016-00852R1_Supplemental_Figure_S5.pdf [file supp_pp.16.00852_PP2016-00852R1_Supplemental_Figure_S5.pdf]

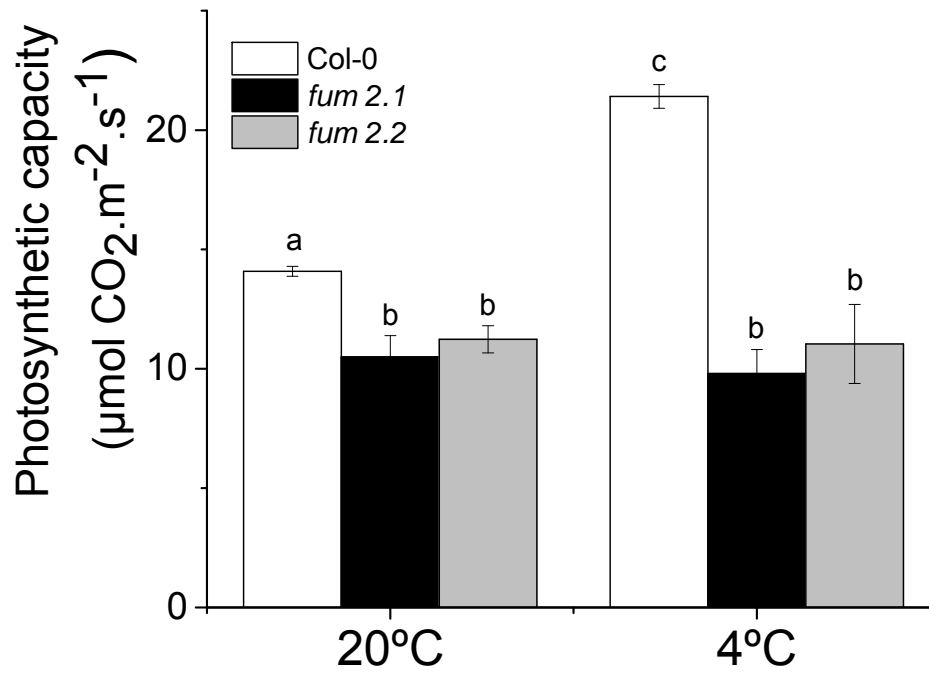

1

2 **Figure S5.** Photosynthetic capacity in plants of Col-0, *fum2.1* and *fum2.2* grown at 20 °C for 8 w and  
 3 in plants then acclimated to 4 °C for 7 d. Each bar represents the mean +/- standard error of at least  
 4 3 replicate plants, letters indicate significantly different values (ANOVA  $p < 0.05$ ). Photosynthetic  
 5 capacity is taken as the rate of photosynthesis measured on attached leaves at 20°C, following 20  
 6 mins illumination at  $2000 \mu\text{mol} \cdot \text{m}^{-2} \cdot \text{s}^{-1}$ , in an atmosphere of  $2000 \mu\text{L L}^{-1} \text{CO}_2$

7
